# Supplementary material
Source: PubMed Central journal article supplement (PMC5620122)
Supplement: NIHMS897200-supplement-Graphic_Abstract.pdf [file NIHMS897200-supplement-Graphic_Abstract.pdf]

# Injury

*Required for neointima formation*

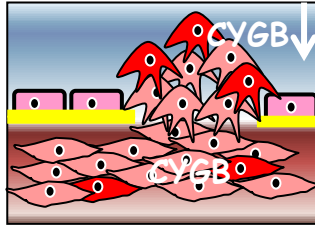

# Baseline

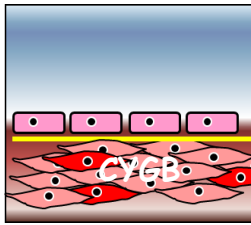

EC = Endothelial cells  
SMC = Smooth Muscle Cells

~~CYGB~~

*No neointima formation*

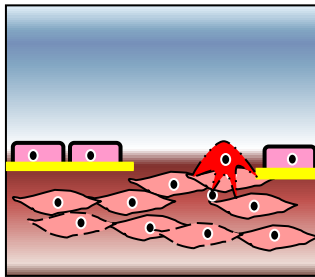

Hypoxia  
IL-1 $\beta$   
IFN- $\gamma$

↑ CYGB

NO ↓  
ROS ↑

↑ Cleaved caspase-3

↑ SMC apoptosis
